# Supplementary material
Source: HighWire-hosted journal article supplement (https://thorax.bmj.com/highwire/filestream/173946/field_highwire_adjunct_files/3/6211981webonlyapp4.xls)
Supplement: 6211981webonlyapp4.xls [file 6211981webonlyapp4.xls]

## Sheet: Sheet1
Operational Code	Work Place Descriptor	Total Number	Work Location Grouping	Label used on Figures 4 and 5
Op1	VVC Heads	10	2 Machining - other sump	Machining 5
Op2	Camshafts	16	2 Machining - other sump	Machining 4													.
Op3	Con Rods	20	2 Machining - other sump	Machining 8													.
Op4	KV6 Assembly	51	3 Assembly and other manufacturing	Assembly 2													.
Op5	KV6 Block Machining	14	2 Machining - other sump	Machining 3													.
Op6	Prismatic Heads	34	1 Machining - largest sump	Machining 1													.
Op7	K Administration	4	3 Assembly and other manufacturing														.
Op8	K Blocks	32	1 Machining - largest sump	Machining 2													.
Op9	K Blocks Expansion Line	4	2 Machining - other sump														.
Op10	K Cranks	41	2 Machining - other sump														.
Op11	K Assembly Cell 4	153	3 Assembly and other manufacturing	Assembly 1													.
Op12	Eng Tech Services	11	4 All over plant	Maintenance 1													.
Op13	KV6 Head Machining	14	2 Machining - other sump	Machining 7													.
Op14	Disc Skim	5	2 Machining - other sump														.
Op15	L Series Assy	32	3 Assembly and other manufacturing	Assembly 3													.
Op16	Project	2	4 All over plant	Project 1													.
Op17	L Series Crankshaft m/c	8	2 Machining - other sump														.
Op18	PR3 Machining	18	2 Machining - other sump	Machining 6													.
Op19	Physical Logistics	44	4 All over plant	Distribution 1													.
Op20	Logistics Labour	5	4 All over plant	Distribution 2													.
Op21	Cutter Grinding	15	3 Assembly and other manufacturing	Tool 4													.
Op22	Technical Engineering Mngr	4	4 All over plant														.
Op23	Engine Machining	14	4 All over plant	Tool 1													.
Op24	Engine Assy & Test	9	5 Outside/office building
Op25	Forward Planning	3	5 Outside/office building
Op26	Eng Quality Control	5	4 All over plant
Op27	Warranty	9	3 Assembly and other manufacturing
Op28	Metrology Lab	4	3 Assembly and other manufacturing
Op29	Sub-contactor1	2	4 All over plant
Op30	Sub-contractor2	1	4 All over plant
Op31	Sub-contractor3	25	4 All over plant	Cleaning 1
Op32	Engineering Garage	9	4 All over plant
Op33	Displaced Staff	6	4 All over plant
Op34	Directorate	3	5 Outside/office building
Op35	Product Engineering	2	5 Outside/office building
Op36	Test Operations	22	5 Outside/office building
Op37	Engines Engineering	23	5 Outside/office building
Op38	Prod Matl Purchasing	16	5 Outside/office building
Op39	Current Engineering	6	4 All over plant
Op40	Finance	19	5 Outside/office building
Op41	External Sales	3	5 Outside/office building
Op42	Human Resources	10	5 Outside/office building
Op43	Trainees	6	4 All over plant
Op44	Logistics Manger’s Office	1	5 Outside/office building
Op45	Production Control	3	5 Outside/office building
Op46	Logistics Planning	8	5 Outside/office building	Distribution 3
Op47	Toolroom	24	3 Assembly and other manufacturing	Tool 3
Op48	Engineering Services (toolroom)	15	3 Assembly and other manufacturing	Tool 2
Op49	Engine Parts Quality	11	4 All over plant
Op50	Eng Guage Calibration	9	3 Assembly and other manufacturing
Op51	Project Management	11	4 All over plant	Project 2
Op52	Strategy & Bus Planning	3	5 Outside/office building
Op53	Volume Planning	2	5 Outside/office building
Op54	Supply Chain Planning	3	5 Outside/office building
Op55	Material Planning	5	5 Outside/office building
Op56	Subcontractor4	4	3 Assembly and other manufacturing
Op57	Subcontractor5	3	4 All over plant
